# Supplementary material for: CRISPR/Cas9 Edited RAS & MEK Mutant Cells Acquire BRAF and MEK Inhibitor Resistance with MEK1 Q56P Restoring Sensitivity to MEK/BRAF Inhibitor Combo and KRAS G13D Gaining Sensitivity to Immunotherapy
Source: MDPI journal article supplement (doi:10.3390/cancers14215449), 2022-11-05

## Supplementary Data

CRISPR/Cas9 edited RAS & MEK mutant cells acquire BRAF and MEK inhibitor resistance with MEK1 Q56P restoring sensitivity to MEK/BRAF inhibitor combo and KRAS G13D gaining sensitivity to immunotherapy

Elizabeth Turner<sup>1</sup>, Luping Chen, John Foulke, Zhizhan Gu\*, and Fang Tian\*

<sup>1</sup> R&D, American Type Culture Collection (ATCC), Gaithersburg, MD, USA.

\* Correspondence: [zgu@atcc.org](mailto:zgu@atcc.org) & [ftian@atcc.org](mailto:ftian@atcc.org)

## Supplementary Figure Legends

**Supplementary Figure S1. CRISPR/Cas9 Target-site cDNA sequencing of A375 melanoma models.** **A.** Exon structure of unprocessed (top) and processed (bottom) NRAS mRNA. Red arrows indicate the location of primers used for PCR amplification and Sanger sequencing of NRAS cDNA, green arrow indicates location of the translation start codon. **B.** Sanger sequencing chromatogram of NRAS Q61K knock-in target site cDNA expressing heterozygous NRAS c.184 C>A point mutation. **C.** Exon structure of unprocessed (top) and processed (bottom) KRAS mRNA. Red arrows indicate the location of primers used for PCR amplification and Sanger sequencing of KRAS cDNA, green arrow indicates location of the translation start codon. **D.** Sanger sequencing chromatogram of KRAS G13D knock-in target site cDNA expressing heterozygous KRAS c.41 G>A point mutation. **E.** Exon structure of unprocessed (top) and processed (bottom) MEK1 mRNA. Red arrows indicate the location of primers used for PCR amplification and Sanger sequencing of MEK1 cDNA, green arrow indicates location of the translation start codon. **F.** Sanger sequencing chromatogram of MEK1 Q56P knock-in target site cDNA expressing homozygous MEK1 c.170 A>G point mutation. **G.** Sequence of primer pairs used for amplification and Sanger sequencing of NRAS, KRAS, and MEK1 CRISPR/Cas9 target sites.

**Supplementary Figure S2. Drug resistance and growth rates of A375 melanoma models in 2D tissue culture.** **A.** Survival rates by CellTiter-Glo viability assay of A375 WT, NRAS Q61K, KRAS G13D, and MEK1 Q56P melanoma models at 1 nM, 10 nM, and 100 nM dabrafenib. Statistical analysis was performed by two-way ANOVA with multiple comparisons, n=3 for each condition. **B.** Cell survival rates as in (A) at 10 nM, 100 nM, and 1 µM vemurafenib. **C.** Survival rates by CellTiter-Glo viability assay of A375 WT and MEK1 Q56P melanoma models at 1 nM, 4 nM, and 10 nM trametinib. Statistical analysis was performed by two-way ANOVA with multiple comparisons, n=3 for each condition. **D.** Cell survival rates as in (C) at 10 nM, 100 nM, and 1 µM binimetinib. **E.** Growth rates of A375 WT, NRAS Q61K, KRAS G13D, and MEK1 Q56P melanoma models in 2D tissue culture, as measured by confluence.

**Supplementary Figure S3. Genomic loci screened for off-target Cas9 cutting in A375 NRAS Q61K.** **A.** Off-target cutting screen for NRAS knock-in sgRNA1 with off-target sequence, genomic

coordinates, number of mismatches from the target sequence, and sequence of primers used for amplification and Sanger sequencing of each off-target locus. Off-target sites were selected based on number of mismatches relative to the target sequence and by proximity to known coding regions. No indels were detected. **B.** The same as in (A) for NRAS knock-in sgRNA2. No indels were detected.

**Supplementary Figure S4. Genomic loci screened for off-target Cas9 cutting in A375 KRAS G13D. A.** Off-target cutting screen for KRAS knock-in sgRNA1 with off-target sequence, genomic coordinates, number of mismatches from the target sequence, and sequence of primers used for amplification and Sanger sequencing of each off-target locus. Off-target sites were selected based on number of mismatches relative to the target sequence and by proximity to known coding regions. No indels were detected. **B.** The same as in (A) for KRAS knock-in sgRNA2. No indels were detected.

**Supplementary Figure S5. Genomic loci screened for off-target Cas9 cutting in A375 MEK1 Q56P. A.** Off-target cutting screen for MEK1 knock-in sgRNA1 with off-target sequence, genomic coordinates, number of mismatches from the target sequence, and sequence of primers used for amplification and Sanger sequencing of each off-target locus. Off-target sites were selected based on number of mismatches relative to the target sequence. No indels were detected. **B.** The same as in (A) for MEK1 knock-in sgRNA2. No indels were detected.

**Supplementary Figure S6. Cas9/CMV plasmid sequence integration screening of A375 NRAS Q61K, KRAS G13D, and MEK1 Q56P melanoma models. A.** Cas9/CMV plasmid sequence integration screening of A375 NRAS Q61K. **B.** Cas9/CMV plasmid sequence integration screening of A375 KRAS G13D. **C.** Cas9/CMV plasmid sequence integration screening of A375 MEK1 Q56P. **D.** Primer pairs used in Cas9/CMV plasmid integration screening.

Supplementary Figure S1

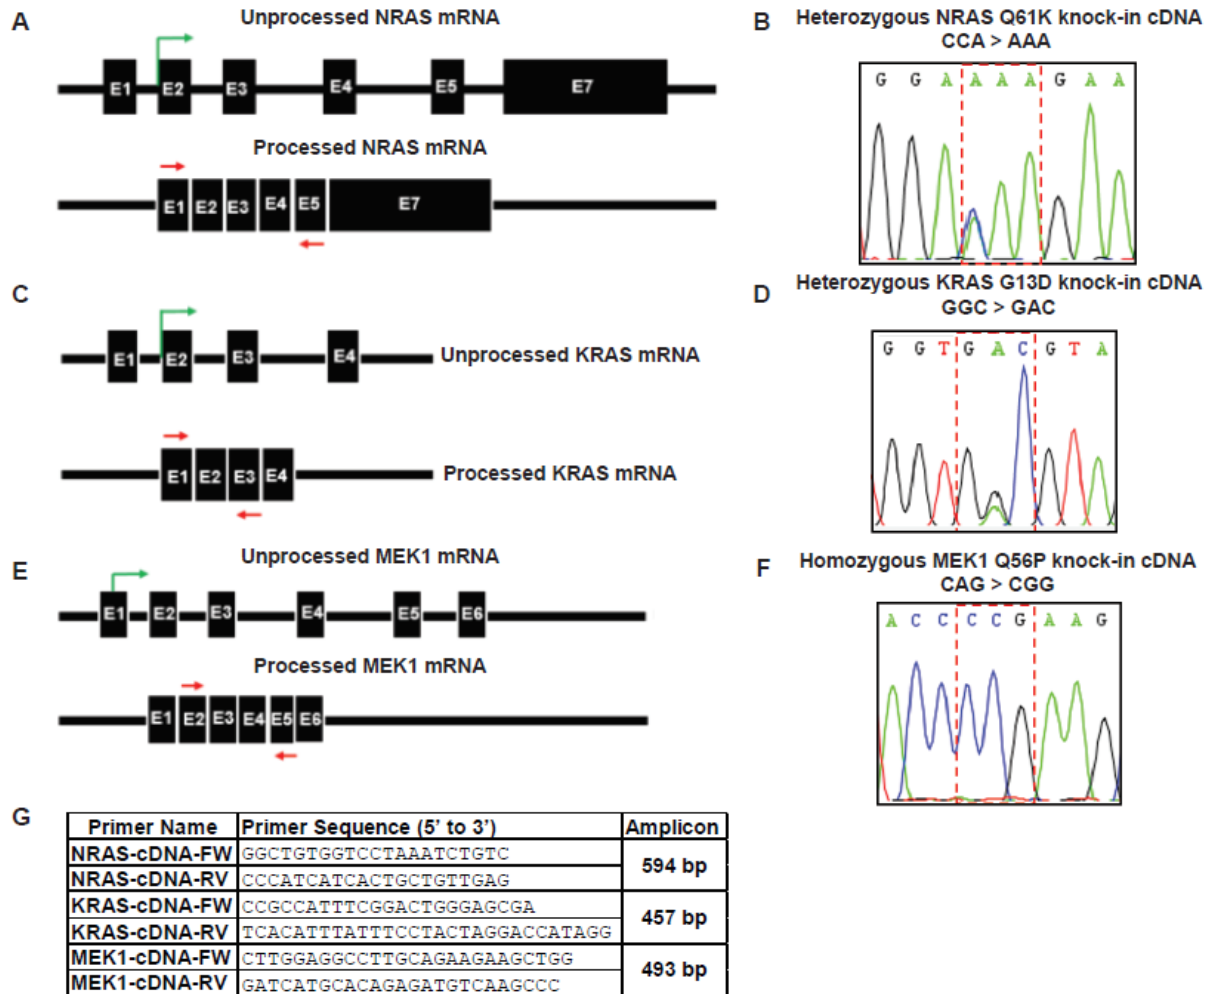

Supplementary Figure S2

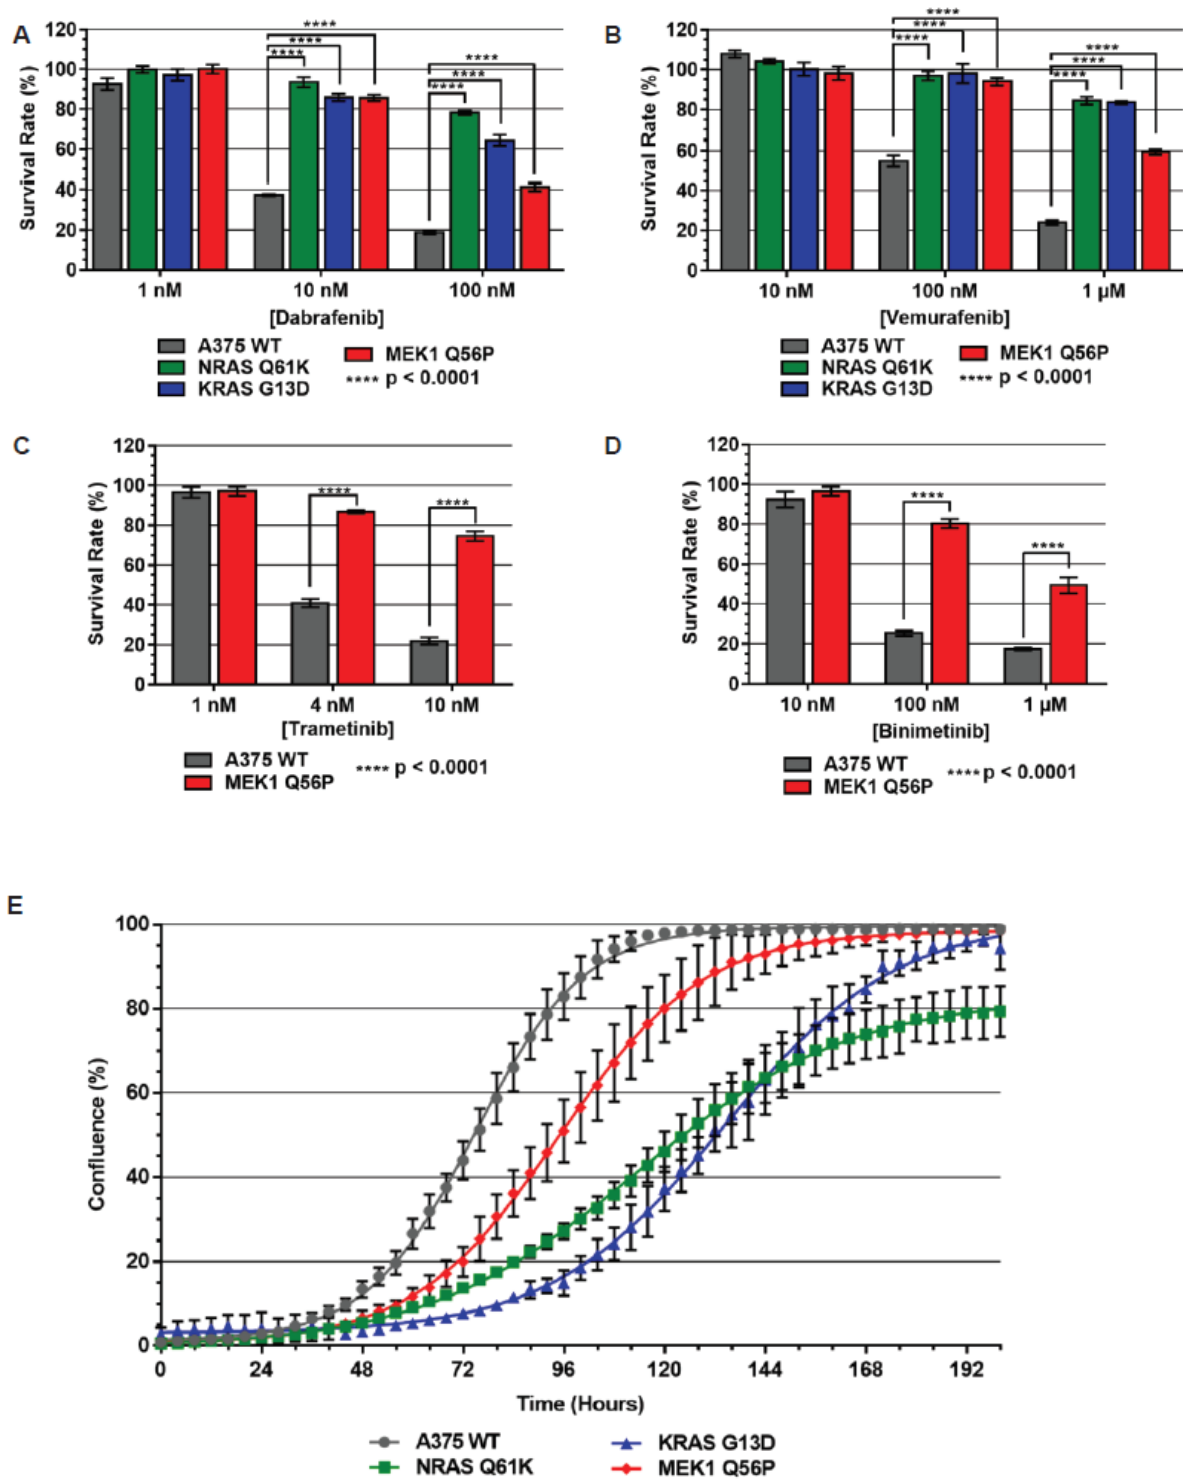

Supplementary Figure S3

**A**

| Target             | Coordinates                              | Strand | MM | Target Sequence         | PAM | Gene      | Primer Sequences (5' to 3')                                     | Result   |
|--------------------|------------------------------------------|--------|----|-------------------------|-----|-----------|-----------------------------------------------------------------|----------|
| NRAS sgRNA1 Target | <a href="#">chr1:114714381-114714403</a> | -      | 0  | TAGGGCCA[GGTTATAATTGG]  | TGG | NRAS      | TGCAIGTTTGTCTTCTGAGA<br>ATCTTTTCCATTACATACTGAAAGATG             | N/A      |
| NRAS sgRNA1 OT1    | <a href="#">chr19:39083209-39083231</a>  | +      | 3  | TACGGGA[GGTTATAATTGG]   | GGG | PAPL      | CCCAACACCTTGTATCACAATAGC<br>CACATAGGCTTCTACTGATTGIGG            | No Indel |
| NRAS sgRNA1 OT2    | <a href="#">chr13:74391887-74391909</a>  | -      | 3  | TAGTGTCA[GAATTATAATTGG] | AGG | RPL21P108 | GGTGTGGACATTATAAGCTAAACATGTAA<br>CCAGGCACAGAGTACTTGTACGGGAAGTGT | No Indel |
| NRAS sgRNA1 OT3    | <a href="#">chrX:107907663-107907685</a> | -      | 3  | GAGGGACA[GGTGATAATTGG]  | AGG | MID2      | CAGAGACACAGACATTGAGAAATGAGGAGA<br>GGAAGAGATGTCTCTTCATTGTGCTTTGG | No Indel |
| NRAS sgRNA1 OT4    | <a href="#">chr1:176489495-176489517</a> | +      | 4  | TGGTGACA[CGTTATAATTGG]  | TAG | PAPPA2    | GGATTTTATGCTAGAGAGGAGCTTCC<br>GAGATTCAGCATCTCTGCTTGCCATA        | No Indel |
| NRAS sgRNA1 OT5    | <a href="#">chr2:232785583-232785605</a> | +      | 4  | TAGTCCA[CGTTATAATTGG]   | GGG | GIGYF2    | GGGTTTGATCCACTTCCAGACTCAC<br>GAGATTCAGCATCTCTGCTTGCCATA         | No Indel |
| NRAS sgRNA1 OT6    | <a href="#">chr2:195608816-195608838</a> | +      | 4  | TGCAGCCA[GGCTATAATTGG]  | CAG | SLC39A10  | GTGTCATGAGGGCTAAGTGCAGTAA<br>CCAGCCGTGGGAGGTTATTTCAGAC          | No Indel |

**B**

| Target             | Coordinates                              | Strand | MM | Target Sequence        | PAM | Gene       | Primer Sequences (5' to 3')                                  | Result   |
|--------------------|------------------------------------------|--------|----|------------------------|-----|------------|--------------------------------------------------------------|----------|
| NRAS sgRNA2 Target | <a href="#">chr1:114713566-114713588</a> | -      | 0  | ACATAAGT[GAAGCTTGCTAC] | TGG | NRAS       | TGCAIGTTTGTCTTCTGAGA<br>ATCTTTTCCATTACATACTGAAAGATG          | N/A      |
| NRAS sgRNA2 OT1    | <a href="#">chr5:141428584-141428606</a> | -      | 3  | TCTTCAGT[GAAGCTTGCTAC] | CAG | PCDHGB8P   | GCCACACAGAAAGGAACAGGAAT<br>GGTTGCTTTCACCTTGGTCTCTGT          | No Indel |
| NRAS sgRNA2 OT2    | <a href="#">chr6:6363617-6363639</a>     | -      | 3  | AAACAAGT[GCAGCTTGCTAC] | CAG | LY86-AS1   | GCAAGGCTGTTGACAAAAGTCTCTG<br>GCCTGAGAATACTCTTGTCTCTCATCTT    | No Indel |
| NRAS sgRNA2 OT3    | <a href="#">chr3:60951631-60951653</a>   | +      | 3  | AAAGAAGT[GCAGCTTGCTAC] | CAG | FHIT       | ACAATAAGGCAGCCCATGACCAA<br>CCCATCTAGATCATCTCTCTTAAATACT      | No Indel |
| NRAS sgRNA2 OT4    | <a href="#">chr4:186040203-186040225</a> | +      | 3  | ACAGTAGT[TAAGCTTGCTAC] | CAG | RNU4-64P   | GTCTGTGCAACGCGGAGCCATTGAT<br>CCCATATAAGCTCTGGAGTATTAAGGAC    | No Indel |
| NRAS sgRNA2 OT5    | <a href="#">chr4:24464902-24464924</a>   | -      | 4  | GCAGAGGG[GAAGCTTGCTAC] | TGG | AC092846.1 | GGATTCCTTGAGTCCAGGCGTTCAAGAC<br>CCCATATAAGCTCTGGAGTATTAAGGAC | No Indel |
| NRAS sgRNA2 OT6    | <a href="#">chr2:113212262-113212284</a> | +      | 4  | CTGTCACT[GAAGCTTGCTAC] | CAG | PAX8-AS1   | GCAATTAACTCTTCTGGGTCTCTCA<br>CTCCAGTTTCAGGAGCCGAGCTCTCT      | No Indel |

Supplementary Figure S4

**A**

| Target             | Coordinates                               | Strand | MM | Target Sequence         | PAM | Gene          | Primer Sequences (5' to 3')                                   | Result   |
|--------------------|-------------------------------------------|--------|----|-------------------------|-----|---------------|---------------------------------------------------------------|----------|
| KRAS sgRNA1 Target | <a href="#">chr12:25245605-25245627</a>   | -      | 0  | GCATTTT [CTTAAGCGTGA]   | TGG | KRAS          | CCCATGACACAATCCAGCTT<br>CTGCTGCTGGTCTTTACTTTGG                | N/A      |
| KRAS sgRNA1 OT1    | <a href="#">chr11:119058359-119058381</a> | +      | 3  | GCATTTTC [CTTAAGCTGGA]  | TGG | HYOU1         | GTGCTGTAAATCCAGCTACTCAGA<br>GACCACTCTCCACCTAAGCATCAGAAA       | No Indel |
| KRAS sgRNA1 OT2    | <a href="#">chr8:108920528-108920550</a>  | +      | 3  | GCATCTTT [CTTAAGCATGA]  | GGG | RP11-1084E5.1 | GCTCCAGATCACCGCTCTTCTCTAC<br>GTCACTTCATGCTATGAGAAGTTCTGCA     | No Indel |
| KRAS sgRNA1 OT3    | <a href="#">chr9:5939470-5939492</a>      | +      | 4  | GAATCTTT [CTTAATCATGA]  | TGG | KIAA2026      | GTTATCATTTCTTACAATATCTTCAGTTA<br>ATCACTGAAATCATAATACCATGCCATC | No Indel |
| KRAS sgRNA1 OT4    | <a href="#">chrX:120553913-120553935</a>  | +      | 4  | ACATTTCT [TTTAAGCGTAGA] | GGG | CUL4B         | GCAACATAGCAAGACCCCATATCTC<br>GAGCTCTGAAGCCACAGATTTTAAATTC     | No Indel |
| KRAS sgRNA1 OT5    | <a href="#">chr16:87963594-87963616</a>   | +      | 4  | GGACTTTT [CTTAAGGCTGA]  | TGG | BANP          | GACTGGCCGCTCTGCATGGATCTGAT<br>GTCAAGCCAGGCTTCTGTATTTAACAAT    | No Indel |
| KRAS sgRNA1 OT6    | <a href="#">chr15:60162524-60162546</a>   | -      | 4  | GCATAATT [CTTAAGCATGGA] | AGG | RP11-82L7.4   | GCTGCAGTTGGATTGGATCGGACTT<br>GTGCAGAGTGCCAGCAAGCTGGTTT        | No Indel |

**B**

| Target             | Coordinates                              | Strand | MM | Target Sequence         | PAM | Gene          | Primer Sequences (5' to 3')                                 | Result   |
|--------------------|------------------------------------------|--------|----|-------------------------|-----|---------------|-------------------------------------------------------------|----------|
| KRAS sgRNA2 Target | <a href="#">chr12:25245015-25245037</a>  | -      | 0  | GTATTTC [GAGTTTCGTGAG]  | AGG | KRAS          | CCCATGACACAATCCAGCTT<br>CTGCTGCTGGTCTTTACTTTGG              | N/A      |
| KRAS sgRNA2 OT1    | <a href="#">chr18:73343401-73343423</a>  | +      | 4  | GCTTTTCA [GACGTTCTGAG]  | AGG | CTD-2354A18.1 | GCCAGCTGGTCTTGACCTCTGA<br>CCTGTAOCTCACTGATCACTTTTGGC        | No Indel |
| KRAS sgRNA2 OT2    | <a href="#">chr5:126961339-126961361</a> | +      | 4  | AAATTTCA [GAGAACTGTGAG] | AGG | 3-Mar         | GCAAGCACAACACAGGTCCTTCTAC<br>GCATACTGTGGCATTATCTCTGCCCTT    | No Indel |
| KRAS sgRNA2 OT3    | <a href="#">chr3:102032478-102032500</a> | +      | 4  | GAACTTCT [GAGTTTAGTGAG] | TGG | RP11-221J22.2 | TGTGAAGTGCTTACTGAACATCTTTGTGG<br>CCACAAATGTTATTTTGTCTGAGGC  | No Indel |
| KRAS sgRNA2 OT4    | <a href="#">chr15:41054090-41054112</a>  | -      | 4  | GTTTGA [GAGTTTGTGAG]    | AGG | INO80         | CACCCCTATTAGTGATAAAATGTCCTAA<br>GAGGTCTTCTTTACTTACCTTGTCAGA | No Indel |
| KRAS sgRNA2 OT5    | <a href="#">chr6:144838615-144838637</a> | -      | 4  | GIGTATA [GAGTTTGTGAG]   | GGG | UTRN          | CAGCTCATCTCCAGGCAATATTGAGA<br>GTAACATCTGCACTCCCTATATGATGG   | No Indel |
| KRAS sgRNA2 OT6    | <a href="#">chr16:3756542-3756564</a>    | -      | 4  | CCATTTC [GGGTTTGTGAG]   | TGG | CREBBP        | GACTTGCAATGAGTGTGCTTCTCTA<br>GGCACATGGACATTACAGGCTG         | No Indel |

Supplementary Figure S5

A

| Target             | Coordinates                               | Strand | MM | Target Sequence         | PAM | Gene     | Primer Sequences (5' to 3')                             | Result   |
|--------------------|-------------------------------------------|--------|----|-------------------------|-----|----------|---------------------------------------------------------|----------|
| MEK1 sgRNA1 Target | <a href="#">chr15:66434832-66434854</a>   | +      | 0  | CATGTTGG [TGATAGTCATCC] | CGG | MEK1     | GAGGATTTCTACTGTTGTGATTACAG<br>GGTATCCTGGCATTCTCTCCACAG  | N/A      |
| MEK1 sgRNA1 OT1    | <a href="#">chr1:10853864-10853886</a>    | -      | 3  | AATGATGG [TGACAGTCATCC] | TGG | HSPE1P24 | ACCACCCACCAACCATTTGCTAC<br>TGGTGATGTGGATGTTGATCAGGATAGT | No Indel |
| MEK1 sgRNA1 OT2    | <a href="#">chr22:29816431-29816453</a>   | +      | 3  | CAAGTTGG [AGTTAGTCATCC] | AGG | ASCC2    | CAAATGGTTGCCAGAGTCTGTG<br>ATGCTCGAACTACGCACTCAC         | No Indel |
| MEK1 sgRNA1 OT3    | <a href="#">chr2:86435176-86435198</a>    | -      | 3  | CATGTTT [TGACAGTCATCC]  | AGG | KDM3A    | CTGAGGGAGGAGAATTGGTTG<br>TCTATGGCTGATTCACACTACAG        | No Indel |
| MEK1 sgRNA1 OT4    | <a href="#">chr20:4745349-4745371</a>     | -      | 3  | AATGTTGG [TGTCAGTCATCC] | TGG | PRNT     | GGTGATCCCTTTGCCCATTTGT<br>GGAGCCATAAGCTCTCAAGTCTGT      | No Indel |
| MEK1 sgRNA1 OT5    | <a href="#">chr11:108532803-108532825</a> | -      | 4  | CAAGTATG [AGATAGTCATCC] | AGG | EXPH5    | CTCTTGAAGCAAGGCTAGCCA<br>CTTGCAATCCAGGGCTGTACTC         | No Indel |
| MEK1 sgRNA1 OT6    | <a href="#">chr19:5663907-5663929</a>     | +      | 4  | ACTCTTGG [TGAAAGTCATCC] | TGG | SAFB     | CGAGAGAGATGGCAGGTGCATT<br>GGTCCCTGTGGTCAAAAGTCGTGG      | No Indel |
| MEK1 sgRNA1 OT7    | <a href="#">chr3:185058989-185059011</a>  | -      | 4  | CTTTTGA [TCATAGTCATCC]  | TGG | VPS8     | GTGGGCAGATCACTTGAAGCTAG<br>GCCACGTTGTGGGATTCAGGAT       | No Indel |
| MEK1 sgRNA1 OT8    | <a href="#">chr8:137426391-137426413</a>  | -      | 4  | GATATGG [TGACAGTCATCC]  | AGG | ZYXP1    | GCATGGTGGCAGGCGACTATAA<br>GCCTGTGGAAAGTGAAGTCGGAAA      | No Indel |
| MEK1 sgRNA1 OT9    | <a href="#">chr15:29974505-29974527</a>   | -      | 4  | CATTTCT [TAATAGTCATCC]  | CGG | TJP1     | GGGCAACACAGTGGGACTTCATC<br>CCTTGCTTTGAGTTTATCTGCTCCTCT  | No Indel |
| MEK1 sgRNA1 OT10   | <a href="#">chr3:112605446-112605468</a>  | +      | 4  | CATGATGA [CGGTAGTCATCC] | TGG | CCDC80   | GAGGTTTCAATAAATACTCATGAATAGG<br>CCCAATGTGGTCCATGGTATGTG | No Indel |

B

| Target             | Coordinates                               | Strand | MM | Target Sequence          | PAM | Gene          | Primer Sequences (5' to 3')                                 | Result   |
|--------------------|-------------------------------------------|--------|----|--------------------------|-----|---------------|-------------------------------------------------------------|----------|
| MEK1 sgRNA2 Target | <a href="#">chr15:66435621-66435643</a>   | -      | 0  | AAAATTCA [AACAGCACGGCT]  | GGG | MEK1          | GAGGATTTCTACTGTTGTGATTACAG<br>GGTATCCTGGCATTCTCTCCACAG      | N/A      |
| MEK1 sgRNA2 OT1    | <a href="#">chr9:128918779-128918801</a>  | -      | 4  | AAAAATTA [GCCAGCACGGCT]  | GGG | LRRC8A        | AATGCAGTGGCTCGATCTC<br>CCTAGCTTCATGCACATCCT                 | No Indel |
| MEK1 sgRNA2 OT2    | <a href="#">chr10:126245050-126245072</a> | +      | 3  | CAAAATGCA [AACAGCAAGGCT] | GGG | RP11-81B10.2  | GGGACAGGATGGGGGACTAGAAA<br>GTGGCCCTTTCCAAAGCACAGACTG        | No Indel |
| MEK1 sgRNA2 OT3    | <a href="#">chr18:51488559-51488581</a>   | -      | 3  | AAAAATTA [AACAGCATGGCT]  | GGG | RP11-267C16.1 | CTCCCAAGTAGCTGAGACTAAG<br>CGATCATGAAGGGTGTGTGT              | No Indel |
| MEK1 sgRNA2 OT4    | <a href="#">chr7:67719250-67719272</a>    | -      | 4  | TAAAATTA [AACATCACGGCT]  | GGG | RP4-736H5.3   | GGCTGAGCCTCCCGAATAGCTGG<br>GATGAGGCCAGCTAGGTTACAG           | No Indel |
| MEK1 sgRNA2 OT5    | <a href="#">chr7:52788178-52788200</a>    | -      | 4  | AAGAAATGA [AACAGGACGGCT] | GGG | N/A           | CGTAAGTGGGACTACAGGGGTGTACC<br>CTGGACCCCCAACCCAATACACAA      | No Indel |
| MEK1 sgRNA2 OT6    | <a href="#">chr2:74963783-74963805</a>    | -      | 4  | AAAATATA [ACAAGCACGGCT]  | GGG | POLE4         | CACATCATCTCAGCCTCTCAGGG<br>GGGAGTGTCTGGGAGAGGGGAATGA        | No Indel |
| MEK1 sgRNA2 OT7    | <a href="#">chr15:26017137-26017159</a>   | +      | 4  | AAACACA [AGCAACACGGCT]   | GGG | RP11-1084I9.1 | GCCCAGGTGGTTTACAAGGACAT<br>CTGAATGTGTTCCGGTGTAGTGGG         | No Indel |
| MEK1 sgRNA2 OT8    | <a href="#">chr5:157400207-157400229</a>  | +      | 4  | CAAAAACA [AACAGCAAGGCT]  | TGG | ADAM19        | CCTGTATGCACAGGAAAAGGCACAGC<br>CTTCTTTTAAATCAGCTATATCTCCCTGC | No Indel |
| MEK1 sgRNA2 OT9    | <a href="#">chr4:155183086-155183108</a>  | -      | 4  | AAACTAG [AACAGCTCGGCT]   | GGG | AC097467.2    | CTCACTGCRAACTCCGCTCTCTGG<br>GTTTAGCAAGTAGGCACCGCACAG        | No Indel |
| MEK1 sgRNA2 OT10   | <a href="#">chr17:2524519-2524541</a>     | -      | 4  | AACATGCA [ATCAGCTCGGCT]  | GGG | METTL16       | GGTTTCAGTGAGCCGAGATT<br>AAAGACTCAGGAGAGCTCTAGG              | No Indel |

Supplementary Figure S6

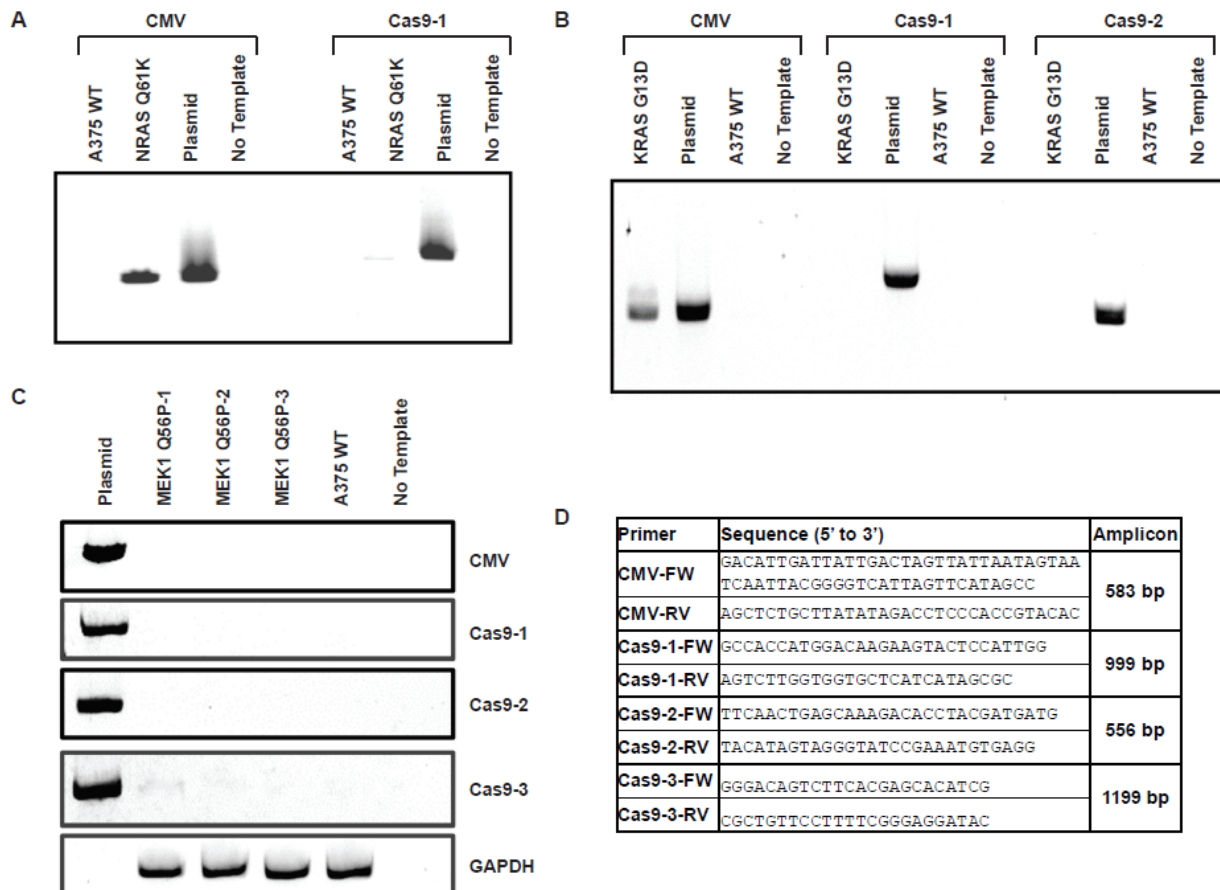

Supplement: s1 [file s1]
